# Supplementary material for: Self-assembled heterometallic complexes showing enhanced two-photon absorption and their distribution in living cells
Source: Royal Society of Chemistry journal article supplement (doi:10.1039/d0nj05219a), 2021-01-01
Supplement: d0nj05219a1.pdf [file d0nj05219a1.pdf]

## Supporting Information

# Self-Assembled Heterometallic Complexes Showing Enhanced Two-Photon Absorption and Their Distribution in Living Cells

Qin Jiang<sup>a,†</sup>, Xinda Yang<sup>a,†</sup>, Pan Xiang<sup>b</sup>, Marta Dudek<sup>c</sup>, Katarzyna Matczyszyn<sup>c,\*</sup>, Marek Samoc<sup>c</sup>, Xiaohe Tian<sup>b,\*</sup>, Yuhui Luo<sup>a</sup>, Qiong Zhang<sup>b</sup>, Daqi Wang<sup>d</sup>, Pengfei Shi<sup>a,\*</sup>

<sup>a</sup>*School of Environmental and Chemical Engineering, Jiangsu Key Laboratory of Function Control Technology for Advanced Materials, Jiangsu Ocean University, Lianyungang 222005, China. [shipf@jou.edu.cn](mailto:shipf@jou.edu.cn).*

<sup>b</sup>*School of Life Science, Anhui University, Hefei 230039, China. [xiaohe.t@ahu.edu.cn](mailto:xiaohe.t@ahu.edu.cn)*

<sup>c</sup>*Advanced Materials Engineering and Modelling Group, Wrocław University of Science and Technology, 50-370 Wrocław, Poland. [katarzyna.matczyszyn@pwr.edu.pl](mailto:katarzyna.matczyszyn@pwr.edu.pl)*

<sup>d</sup>*School of Chemistry, Liaocheng University, Liaocheng, 222005, China*

<sup>†</sup> *These authors contributed equally.*

## CONTENT

|                                                                                            |    |
|--------------------------------------------------------------------------------------------|----|
| Table S1. Crystallographic parameters of the complexes <b>1-4</b> .....                    | 3  |
| Table S2. Selected bond lengths and bond angles of the complex <b>1</b> .....              | 4  |
| Table S3. Selected bond lengths and bond angles of the complex <b>2</b> .....              | 5  |
| Table S4. Selected bond lengths and bond angles of the complex <b>3</b> .....              | 6  |
| Table S5. Selected bond lengths and bond angles of the complex <b>4</b> .....              | 7  |
| Table S6. One-photon spectral data of complexes <b>1 to 6</b> .....                        | 8  |
| Figure. S1 ORTEP drawing for complex <b>1</b> .....                                        | 9  |
| Figure. S2 ORTEP drawing for complex <b>2</b> .....                                        | 9  |
| Figure. S3 ORTEP drawing for complex <b>3</b> .....                                        | 10 |
| Figure. S4 ORTEP drawing for complex <b>4</b> .....                                        | 10 |
| Figure. S5 <sup>1</sup> H NMR spectrum of complex <b>1</b> .....                           | 11 |
| Figure. S6 <sup>1</sup> H NMR spectrum of complex <b>2</b> .....                           | 11 |
| Figure. S7 <sup>1</sup> H NMR spectrum of complex <b>4</b> .....                           | 12 |
| Figure. S8 <sup>1</sup> H NMR spectrum of complex <b>5</b> .....                           | 12 |
| Figure. S9 <sup>1</sup> H NMR spectrum of complex <b>3</b> .....                           | 13 |
| Figure. S10 <sup>1</sup> H NMR spectrum of complex <b>6</b> .....                          | 13 |
| Figure. S11 ESI-MS spectrum of complex <b>1</b> .....                                      | 14 |
| Figure. S12 ESI-MS spectrum of complex <b>2</b> .....                                      | 14 |
| Figure. S13 ESI-MS spectrum of complex <b>3</b> .....                                      | 14 |
| Figure. S14 UV-vis absorption spectra of the DPBF sensitized by complexes <b>1-6</b> ..... | 15 |
| Figure. S15 Single-photon excited fluorescence spectra for complexes <b>1-6</b> .....      | 15 |
| Figure. S16 Co-localization experiments of complex <b>1</b> in HeLa cells. ....            | 16 |
| Figure. S17 Co-localization experiments of complex <b>2</b> in HeLa cells. ....            | 16 |
| Figure. S18 Co-localization experiments of complex <b>3</b> in HeLa cells. ....            | 17 |
| Figure. S19 Co-localization experiments of complex <b>4</b> in HeLa cells. ....            | 17 |
| Figure. S20 Co-localization experiments of complex <b>5</b> in HeLa cells. ....            | 18 |
| Figure. S21 Co-localization experiments of complex <b>6</b> in HeLa cells. ....            | 18 |
| In vitro cytotoxicity of complexes <b>1 to 6</b> in dark and under light irradiation. .... | 19 |

**Table S1. Crystallographic parameters of complexes 1-4**

| Complex                       | <b>1</b>                                                                           | <b>2</b>                                                                                         | <b>3</b>                                                          | <b>4</b>                                                                                            |
|-------------------------------|------------------------------------------------------------------------------------|--------------------------------------------------------------------------------------------------|-------------------------------------------------------------------|-----------------------------------------------------------------------------------------------------|
| Empirical formula*            | C <sub>48</sub> H <sub>62</sub> F <sub>12</sub> N <sub>10</sub> P <sub>2</sub> Ru· | C <sub>53</sub> H <sub>62</sub> F <sub>12</sub> N <sub>10</sub> O <sub>2</sub> P <sub>2</sub> Ru | C <sub>40</sub> H <sub>32</sub> N <sub>10</sub> O <sub>8</sub> Zn | C <sub>62</sub> H <sub>70</sub> F <sub>24</sub> N <sub>10</sub> P <sub>4</sub> O <sub>5</sub> PtRu· |
| Formula weight                | 1282.08                                                                            | 1262.13                                                                                          | 846.12                                                            | 1911.32                                                                                             |
| T [K]                         | 296(2) K                                                                           | 296(2) K                                                                                         | 296(2)                                                            | 298(2) K                                                                                            |
| Crystal system                | Triclinic                                                                          | Triclinic                                                                                        | Tetragonal                                                        | Orthorhombic                                                                                        |
| Space group                   | P-1                                                                                | P-1                                                                                              | P4 <sub>3</sub>                                                   | Pnma                                                                                                |
| a [Å]                         | 9.053(7)                                                                           | 9.179(3)                                                                                         | 9.125(2)                                                          | 28.21(2)                                                                                            |
| b [Å]                         | 12.444(10)                                                                         | 12.056(4)                                                                                        | 9.125(2)                                                          | 59.04(4)                                                                                            |
| c [Å]                         | 21.163(17)                                                                         | 21.623(7)                                                                                        | 44.906(12)                                                        | 8.65(7)                                                                                             |
| α [°]                         | 84.573(13)                                                                         | 96.203(5)                                                                                        | 90°                                                               | 90°                                                                                                 |
| β [°]                         | 83.905(12)                                                                         | 99.507(5)                                                                                        | 90°                                                               | 90°                                                                                                 |
| γ [°]                         | 89.958(12)                                                                         | 92.535(5)                                                                                        | 90°                                                               | 90°                                                                                                 |
| V/Å <sup>3</sup>              | 2360(1)                                                                            | 2341.5(13)                                                                                       | 3740(1)                                                           | 1441.0(2)                                                                                           |
| Z                             | 2                                                                                  | 2                                                                                                | 4                                                                 | 8                                                                                                   |
| D calcd/(g·cm <sup>-3</sup> ) | 1.804                                                                              | 1.790                                                                                            | 1.503                                                             | 1.762                                                                                               |
| F(000)                        | 1316                                                                               | 1296                                                                                             | 1744                                                              | 7600                                                                                                |
| Absorption coefficient        | 0.516 mm <sup>-1</sup>                                                             | 0.511 mm <sup>-1</sup>                                                                           | 0.727 mm <sup>-1</sup>                                            | 2.355 mm <sup>-1</sup>                                                                              |
| θ range                       | 1.644~25.008°                                                                      | 2.051~27.764°                                                                                    | 1.814~27.705°                                                     | 2.571~25.019°                                                                                       |
| Reflections collected         | 11750                                                                              | 21914                                                                                            | 22742                                                             | 71293                                                                                               |
| independent reflections       | 8143                                                                               | 10770                                                                                            | 8559                                                              | 12790                                                                                               |
| GOF on F <sup>2</sup>         | 1.002                                                                              | 1.005                                                                                            | 1.018                                                             | 0.982                                                                                               |
| R1 [I>2σ(I)]                  | 0.1276                                                                             | 0.0657                                                                                           | 0.0388                                                            | 0.0882                                                                                              |
| wR <sub>2</sub> [I>2σ(I)]     | 0.3285                                                                             | 0.0886                                                                                           | 0.0875                                                            | 0.1158                                                                                              |
| CCDC                          | 1940334                                                                            | 1940333                                                                                          | 1940270                                                           | 1957691                                                                                             |

\*Solvent molecules are included in the empirical formula

**Table S2. Selected bond lengths and bond angles for complex 1**

| Bond Length(Å)   |           |                  |           |
|------------------|-----------|------------------|-----------|
| Ru(1)-N(1)       | 2.00(10)  | C(15)-N(3)       | 1.31(17)  |
| Ru(1)-N(2)       | 2.01(12)  | C(16)-N(4)       | 1.34(16)  |
| Ru(1)-N(5)       | 2.03(9)   | C(20)-N(4)       | 1.35(17)  |
| Ru(1)-N(4)       | 2.10(10)  | C(21)-N(5)       | 1.35(15)  |
| Ru(1)-N(3)       | 2.10(14)  | C(25)-N(5)       | 1.33(14)  |
| Ru(1)-N(6)       | 2.10(10)  | C(26)-N(6)       | 1.34(15)  |
| C(1)-N(1)        | 1.33(16)  | C(30)-N(6)       | 1.32(15)  |
| C(5)-N(1)        | 1.42(16)  | C(31)-N(7)       | 1.22(19)  |
| C(6)-N(2)        | 1.40(17)  | C(11)-N(3)       | 1.38(19)  |
| C(10)-N(2)       | 1.37(19)  | C(35)-N(7)       | 1.41(2)   |
| Bond Angles(°)   |           |                  |           |
| N(1)-Ru(1)-N(2)  | 82.3(4)   | N(5)-Ru(1)-N(3)  | 98.2(5)   |
| N(1)-Ru(1)-N(5)  | 101.9(3)  | N(4)-Ru(1)-N(3)  | 90.2(5)   |
| N(2)-Ru(1)-N(5)  | 175.8(4)  | N(1)-Ru(1)-N(6)  | 90.0(4)   |
| N(1)-Ru(1)-N(4)  | 92.8(4)   | N(2)-Ru(1)-N(6)  | 102.0(4)  |
| N(2)-Ru(1)-N(4)  | 100.6(5)  | N(5)-Ru(1)-N(6)  | 78.8(4)   |
| N(5)-Ru(1)-N(4)  | 78.7(5)   | N(4)-Ru(1)-N(6)  | 157.5(4)  |
| N(1)-Ru(1)-N(3)  | 159.9(5)  | N(3)-Ru(1)-N(6)  | 94.8(4)   |
| N(2)-Ru(1)-N(3)  | 77.6(5)   | C(11)-N(3)-Ru(1) | 113.9(9)  |
| C(1)-N(1)-Ru(1)  | 134.3(8)  | C(20)-N(4)-Ru(1) | 112.2(9)  |
| C(5)-N(1)-Ru(1)  | 111.1(8)  | C(16)-N(4)-Ru(1) | 128.7(11) |
| C(10)-N(2)-Ru(1) | 120.9(10) | C(21)-N(5)-Ru(1) | 119.0(8)  |
| C(6)-N(2)-Ru(1)  | 120.6(10) | C(25)-N(5)-Ru(1) | 117.6(9)  |
| C(15)-N(3)-Ru(1) | 128.0(12) | C(30)-N(6)-Ru(1) | 127.5(9)  |
| C(26)-N(6)-Ru(1) | 112.1(8)  |                  |           |

**Table S3. Selected bond lengths and bond angles for complex 2**

| Bond Length(Å)  |            |                  |           |
|-----------------|------------|------------------|-----------|
| Ru(1)-N(2)      | 1.98(3)    | C(11)-N(3)       | 1.39(5)   |
| Ru(1)-N(6)      | 1.99(3)    | C(15)-N(3)       | 1.35(5)   |
| Ru(1)-N(7)      | 2.05(3)    | C(16)-N(4)       | 1.32(8)   |
| Ru(1)-N(3)      | 2.05(4)    | C(20)-N(4)       | 1.34(8)   |
| Ru(1)-N(1)      | 2.05(4)    | C(21)-N(7)       | 1.34(5)   |
| Ru(1)-N(5)      | 2.04(4)    | C(25)-N(7)       | 1.39(5)   |
| C(1)-N(1)       | 1.34(5)    | C(26)-N(6)       | 1.35(5)   |
| C(5)-N(1)       | 1.37(5)    | C(30)-N(6)       | 1.36(5)   |
| C(6)-N(2)       | 1.35(5)    | C(31)-N(5)       | 1.39(5)   |
| C(10)-N(2)      | 1.35(5)    | C(35)-N(5)       | 1.34(5)   |
| Bond Angles/(°) |            |                  |           |
| N(6)-Ru(1)-N(2) | 176.16(16) | C(1)-N(1)-Ru(1)  | 128.9(4)  |
| N(6)-Ru(1)-N(5) | 78.87(15)  | C(5)-N(1)-Ru(1)  | 114.3(3)  |
| N(2)-Ru(1)-N(5) | 104.97(14) | C(10)-N(2)-Ru(1) | 118.2(3)  |
| N(6)-Ru(1)-N(3) | 100.27(14) | C(6)-N(2)-Ru(1)  | 119.0(3)  |
| N(2)-Ru(1)-N(3) | 79.59(16)  | C(15)-N(3)-Ru(1) | 128.8(3)  |
| N(5)-Ru(1)-N(3) | 91.16(14)  | C(11)-N(3)-Ru(1) | 114.0(3)  |
| N(6)-Ru(1)-N(1) | 101.60(14) | C(35)-N(5)-Ru(1) | 128.9(3)  |
| N(2)-Ru(1)-N(1) | 78.73(16)  | C(31)-N(5)-Ru(1) | 114.7(3)  |
| N(5)-Ru(1)-N(1) | 91.06(14)  | C(26)-N(6)-Ru(1) | 119.5(3)  |
| N(3)-Ru(1)-N(1) | 158.04(14) | C(30)-N(6)-Ru(1) | 120.1(3)  |
| N(6)-Ru(1)-N(7) | 79.01(15)  | C(25)-N(7)-Ru(1) | 114.9(3)  |
| N(2)-Ru(1)-N(7) | 97.16(14)  | C(21)-N(7)-Ru(1) | 128.8(3)  |
| N(5)-Ru(1)-N(7) | 157.77(14) | N(1)-Ru(1)-N(7)  | 91.19(14) |
| N(3)-Ru(1)-N(7) | 94.95(14)  |                  |           |

**Table S4. Selected bond lengths and bond angles for complex 3**

| Bond lengths(Å)  |            |                  |          |
|------------------|------------|------------------|----------|
| Zn(1)-N(4)       | 2.07(4)    | C(15)-N(5)       | 1.33(7)  |
| Zn(1)-N(8)       | 2.07(4)    | C(16)-N(6)       | 1.29(9)  |
| Zn(1)-N(5)       | 2.16(5)    | C(20)-N(6)       | 1.35(9)  |
| Zn(1)-N(9)       | 2.17(5)    | C(21)-N(7)       | 1.32(7)  |
| Zn(1)-N(3)       | 2.20(5)    | C(25)-N(7)       | 1.34(6)  |
| Zn(1)-N(7)       | 2.21(5)    | C(26)-N(8)       | 1.32(7)  |
| C(5)-N(3)        | 1.33(7)    | C(31)-N(10)      | 1.32(10) |
| C(6)-N(4)        | 1.33(7)    | C(35)-N(10)      | 1.29(10) |
| C(10)-N(4)       | 1.34(6)    | C(36)-N(9)       | 1.36(6)  |
| C(11)-N(5)       | 1.34(6)    | C(40)-N(9)       | 1.33(7)  |
| Bond Angles/(°)  |            |                  |          |
| N(4)-Zn(1)-N(8)  | 169.51(16) | C(40)-N(9)-Zn(1) | 126.8(4) |
| N(4)-Zn(1)-N(5)  | 76.31(15)  | C(25)-N(7)-Zn(1) | 113.4(3) |
| N(8)-Zn(1)-N(5)  | 110.58(16) | C(5)-N(3)-Zn(1)  | 114.6(4) |
| N(4)-Zn(1)-N(9)  | 111.44(17) | C(1)-N(3)-Zn(1)  | 126.1(4) |
| N(8)-Zn(1)-N(9)  | 76.56(16)  | C(1)-N(3)-Zn(1)  | 126.1(4) |
| N(5)-Zn(1)-N(9)  | 94.30(18)  | C(6)-N(4)-Zn(1)  | 119.5(3) |
| N(4)-Zn(1)-N(3)  | 75.38(16)  | C(10)-N(4)-Zn(1) | 118.5(3) |
| N(8)-Zn(1)-N(3)  | 97.74(17)  | C(5)-N(3)-Zn(1)  | 114.6(4) |
| N(5)-Zn(1)-N(3)  | 151.61(15) | C(15)-N(5)-Zn(1) | 126.5(4) |
| N(9)-Zn(1)-N(3)  | 94.04(18)  | C(11)-N(5)-Zn(1) | 115.3(3) |
| N(4)-Zn(1)-N(7)  | 96.40(17)  | C(36)-N(9)-Zn(1) | 114.3(3) |
| N(8)-Zn(1)-N(7)  | 75.60(16)  | C(15)-N(5)-Zn(1) | 126.5(4) |
| N(5)-Zn(1)-N(7)  | 93.88(18)  | C(21)-N(7)-Zn(1) | 127.4(4) |
| N(9)-Zn(1)-N(7)  | 152.11(15) | C(25)-N(7)-Zn(1) | 113.4(3) |
| N(3)-Zn(1)-N(7)  | 91.28(17)  | C(10)-N(4)-Zn(1) | 118.5(3) |
| C(11)-N(5)-Zn(1) | 115.3(3)   | C(26)-N(8)-Zn(1) | 118.9(3) |
| C(21)-N(7)-Zn(1) | 127.4(4)   | C(30)-N(8)-Zn(1) | 118.4(3) |

**Table S5. Selected bond lengths and bond angles for complex 4**

| Bond lengths(Å)  |          |                   |           |
|------------------|----------|-------------------|-----------|
| Pt(1)-N(9)       | 1.98(9)  | N(3)-C(15)        | 1.41(14)  |
| Pt(1)-N(10)      | 2.02(13) | N(4)-C(20)        | 1.31(13)  |
| Pt(1)-N(4)       | 2.04(9)  | N(4)-C(16)        | 1.36(14)  |
| Pt(1)-N(8)       | 2.08(12) | N(5)-C(21)        | 1.43(17)  |
| Ru(1)-N(6)       | 1.96(11) | N(5)-C(25)        | 13.5(16)  |
| Ru(1)-N(2)       | 1.99(11) | N(6)-C(30)        | 1.40(18)  |
| Ru(1)-N(3)       | 2.05(10) | N(6)-C(26)        | 1.43(16)  |
| Ru(1)-N(5)       | 2.01(13) | N(7)-C(35)        | 1.39(15)  |
| Ru(1)-N(7)       | 2.05(11) | N(7)-C(31)        | 1.37(17)  |
| Ru(1)-N(1)       | 2.10(9)  | N(8)-C(36)        | 1.35(14)  |
| N(1)-C(1)        | 1.33(13) | N(8)-C(40)        | 1.40(17)  |
| N(1)-C(5)        | 1.43(15) | N(9)-C(41)        | 1.32(15)  |
| N(2)-C(6)        | 1.38(14) | N(9)-C(45)        | 1.35(13)  |
| N(2)-C(10)       | 1.36(14) | N(10)-C(46)       | 1.27(15)  |
| N(3)-C(11)       | 1.35(14) | N(10)-C(50)       | 1.34(15)  |
| Bond Angles/(°)  |          |                   |           |
| N(9)-Pt(1)-N(10) | 79.6(5)  | C(1)-N(1)-Ru(1)   | 127.0(9)  |
| N(9)-Pt(1)-N(4)  | 178.1(5) | C(5)-N(1)-Ru(1)   | 115.7(9)  |
| N(10)-Pt(1)-N(4) | 99.3(5)  | C(6)-N(2)-Ru(1)   | 117.3(10) |
| N(9)-Pt(1)-N(8)  | 82.7(5)  | C(10)-N(2)-Ru(1)  | 118.9(10) |
| N(10)-Pt(1)-N(8) | 162.3(6) | C(11)-N(3)-Ru(1)  | 117.4(10) |
| N(4)-Pt(1)-N(8)  | 98.5(5)  | C(15)-N(3)-Ru(1)  | 125.8(9)  |
| N(6)-Ru(1)-N(2)  | 178.7(5) | C(20)-N(4)-Pt(1)  | 123.9(10) |
| N(6)-Ru(1)-N(3)  | 102.2(5) | C(16)-N(4)-Pt(1)  | 119.2(10) |
| N(2)-Ru(1)-N(3)  | 77.2(5)  | C(21)-N(5)-Ru(1)  | 122.9(12) |
| N(6)-Ru(1)-N(5)  | 79.0(6)  | C(25)-N(5)-Ru(1)  | 117.3(13) |
| N(2)-Ru(1)-N(5)  | 99.9(6)  | C(30)-N(6)-Ru(1)  | 120.3(11) |
| N(3)-Ru(1)-N(5)  | 94.9(4)  | C(26)-N(6)-Ru(1)  | 118.4(12) |
| N(6)-Ru(1)-N(7)  | 77.7(6)  | C(35)-N(7)-Ru(1)  | 128.5(10) |
| N(2)-Ru(1)-N(7)  | 103.5(4) | C(31)-N(7)-Ru(1)  | 114.4(12) |
| N(3)-Ru(1)-N(7)  | 91.2(4)  | C(36)-N(8)-Pt(1)  | 129.0(11) |
| N(5)-Ru(1)-N(7)  | 156.6(6) | C(40)-N(8)-Pt(1)  | 108.8(12) |
| N(6)-Ru(1)-N(1)  | 101.1(4) | C(41)-N(9)-Pt(1)  | 115.1(11) |
| N(2)-Ru(1)-N(1)  | 79.4(5)  | C(45)-N(9)-Pt(1)  | 115.0(10) |
| N(3)-Ru(1)-N(1)  | 156.6(5) | C(46)-N(10)-Pt(1) | 114.7(12) |
| N(5)-Ru(1)-N(1)  | 87.1(4)  | C(50)-N(10)-Pt(1) | 124.0(10) |
| N(7)-Ru(1)-N(1)  | 96.2(4)  |                   |           |

| Complex | UV-vis, $\lambda$ ( $\epsilon \times 10^4$ ) <sup>a</sup> | $\lambda_{\text{ex}}$ (nm) <sup>b</sup> | $\lambda_{\text{em}}$ (nm) <sup>b</sup> | $10^3 \Phi$ <sup>c</sup> | $\tau$ (ns) <sup>c</sup> | $\chi^2$ |
|---------|-----------------------------------------------------------|-----------------------------------------|-----------------------------------------|--------------------------|--------------------------|----------|
| 1       | 490(1.71), 315(4.32), 278(3.93)                           | 469                                     | 654                                     | 0.0008                   | 0.018                    | 1.39     |
| 2       | 494(2.02), 312(5.44), 276(4.29)                           | 467                                     | 665                                     | 0.0022                   | 0.043                    | 1.74     |
| 3       | 324(3.31), 281(5.13)                                      | 310                                     | 360                                     | 0.6859                   | -                        | -        |
| 4       | 489(1.86), 315(5.71), 277(4.60)                           | 495                                     | 685                                     | 0.0064                   | 1.26                     | 1.47     |
| 5       | 494(1.80), 312(5.63), 277(3.59)                           | 493                                     | 693                                     | 0.0059                   | 1.02                     | 1.39     |
| 6       | 332(2.49), 280(6.58)                                      | 310                                     | 370                                     | 0.0937                   | -                        | -        |

**Table S6.** One-photon spectral data of complexes **1** to **6**. <sup>a</sup>UV-vis were measured in DMSO. <sup>b</sup>Represent the maximum excitation and emission wavelengths respectively. <sup>c</sup>One-photon fluorescence data were measured in water.



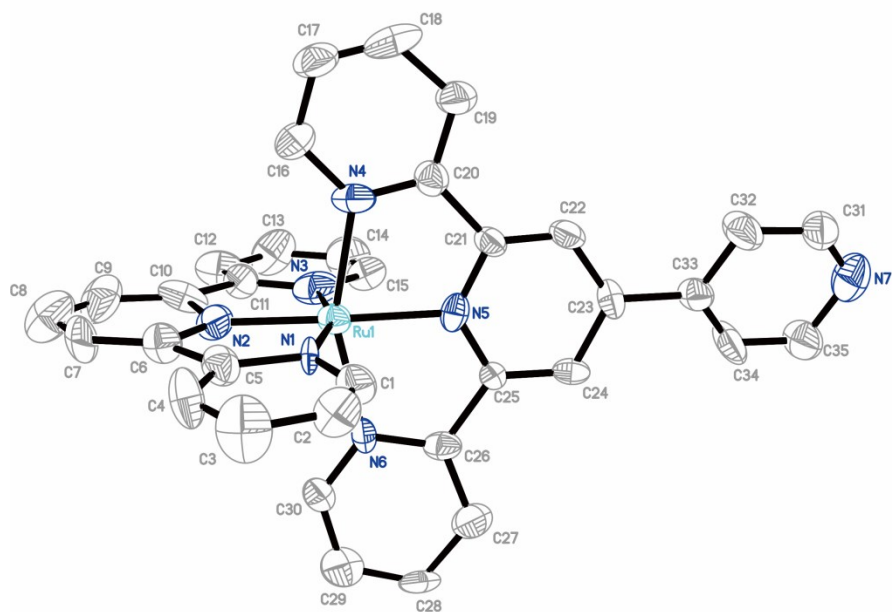

**Figure S1.** ORTEP drawing with 30% ellipse probability for complex **1**. H atoms and anions were omitted for clarity.

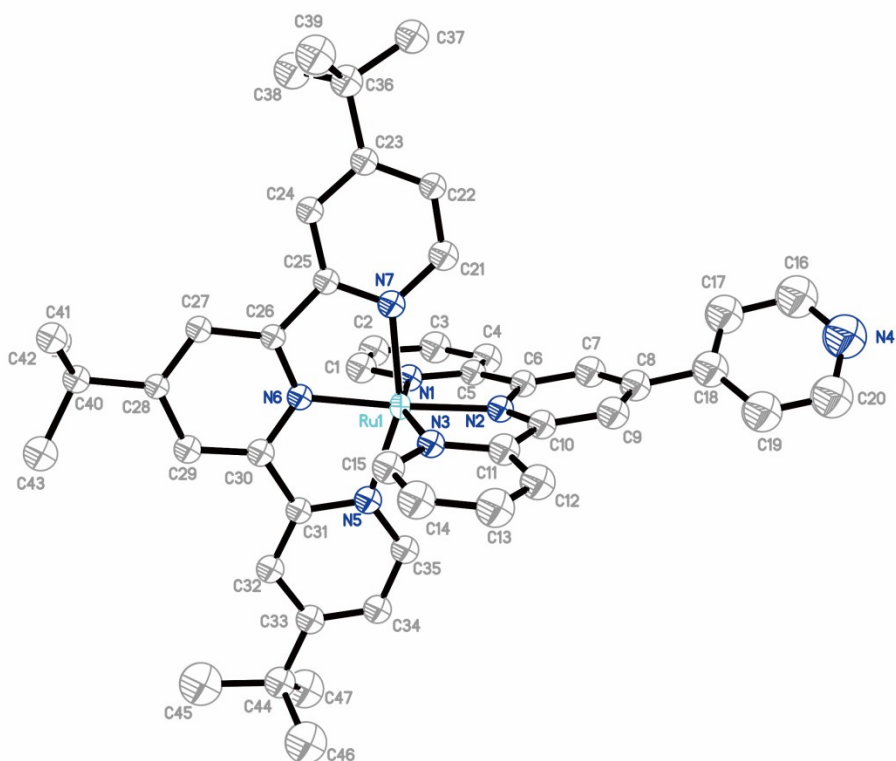

**Figure S2.** ORTEP drawing with 30% ellipse probability for complex **2**. H atoms and anions were omitted for clarity.

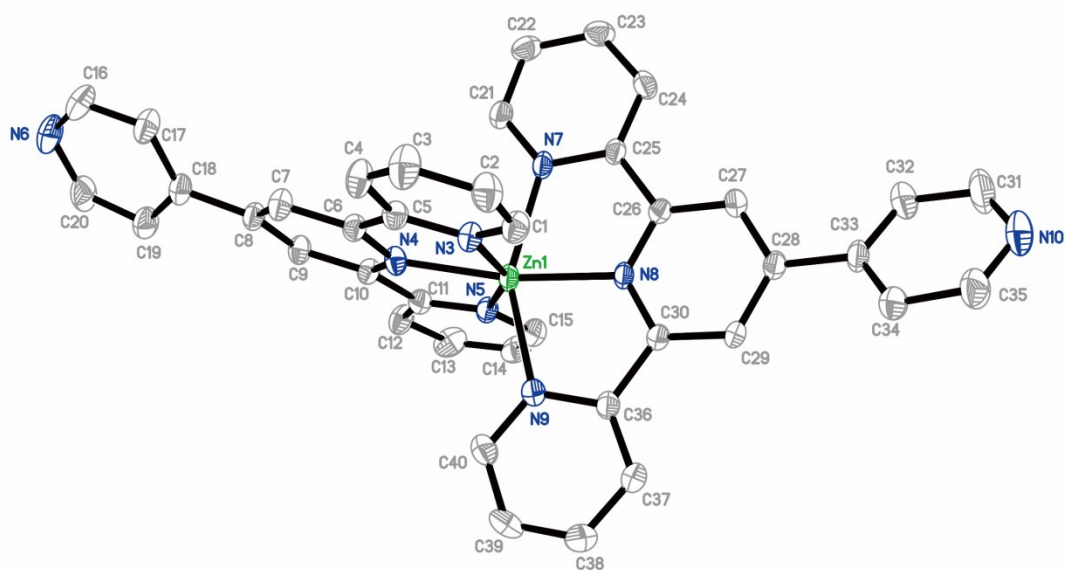

**Figure S3.** ORTEP drawing with 30% ellipse probability for complex **3**. H atoms and anions were omitted for clarity.

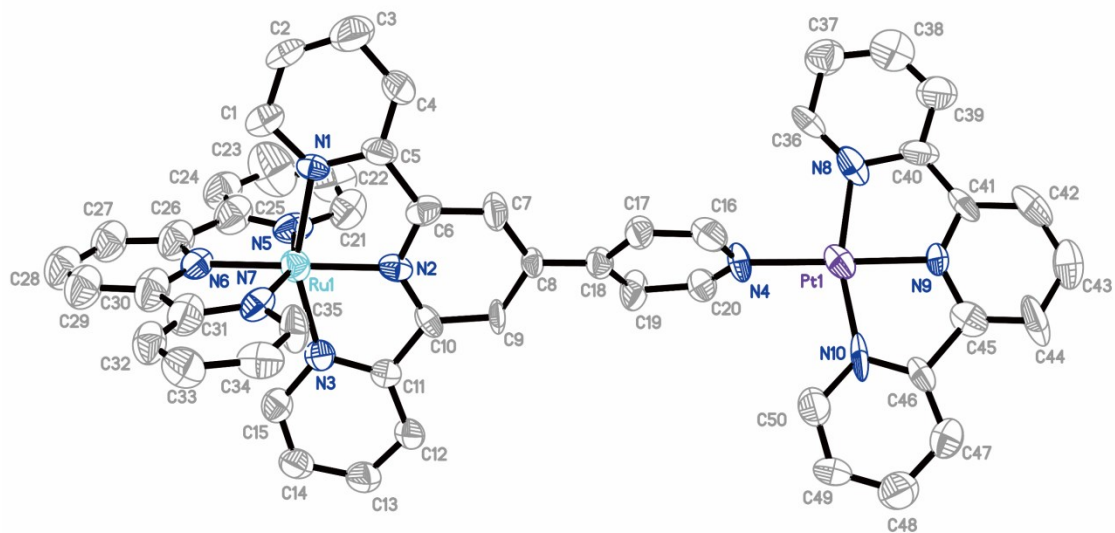

**Figure S4.** ORTEP drawing with 30% ellipse probability for complex **4**. H atoms and anions were omitted for clarity.

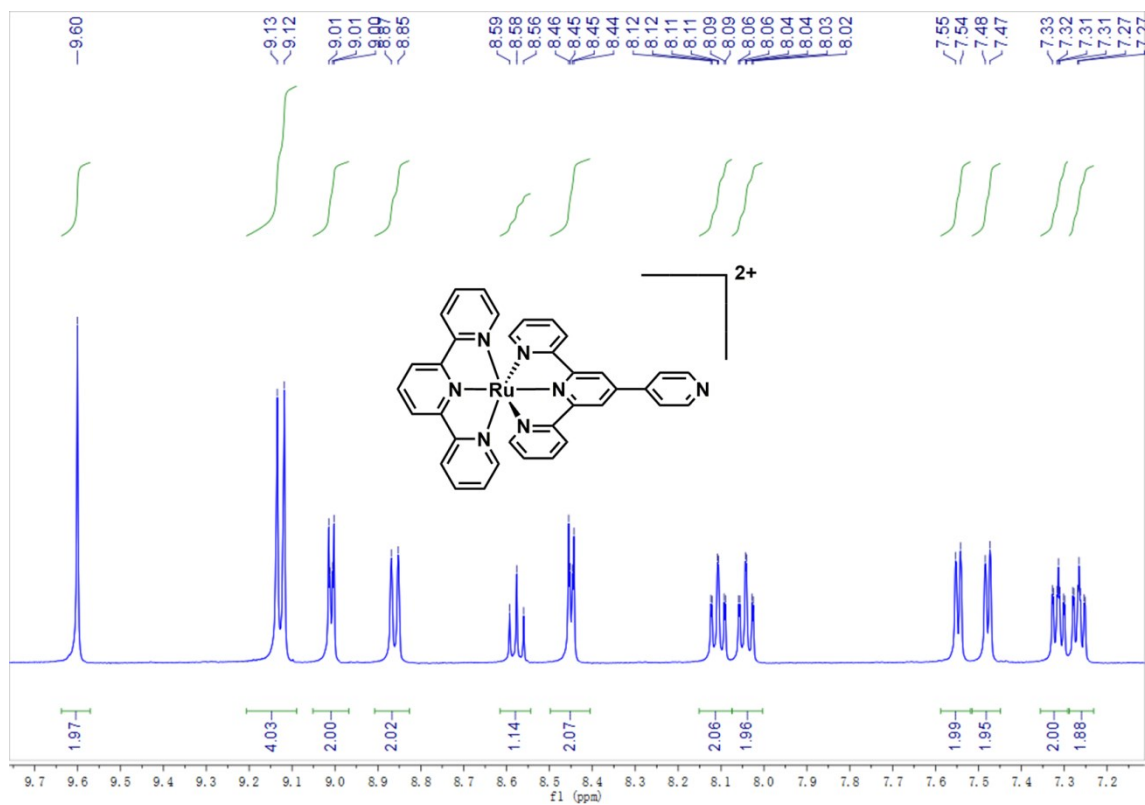

Figure S5.  $^1\text{H}$  NMR spectrum (500 MHz,  $d_6$ -DMSO) of complex 1.

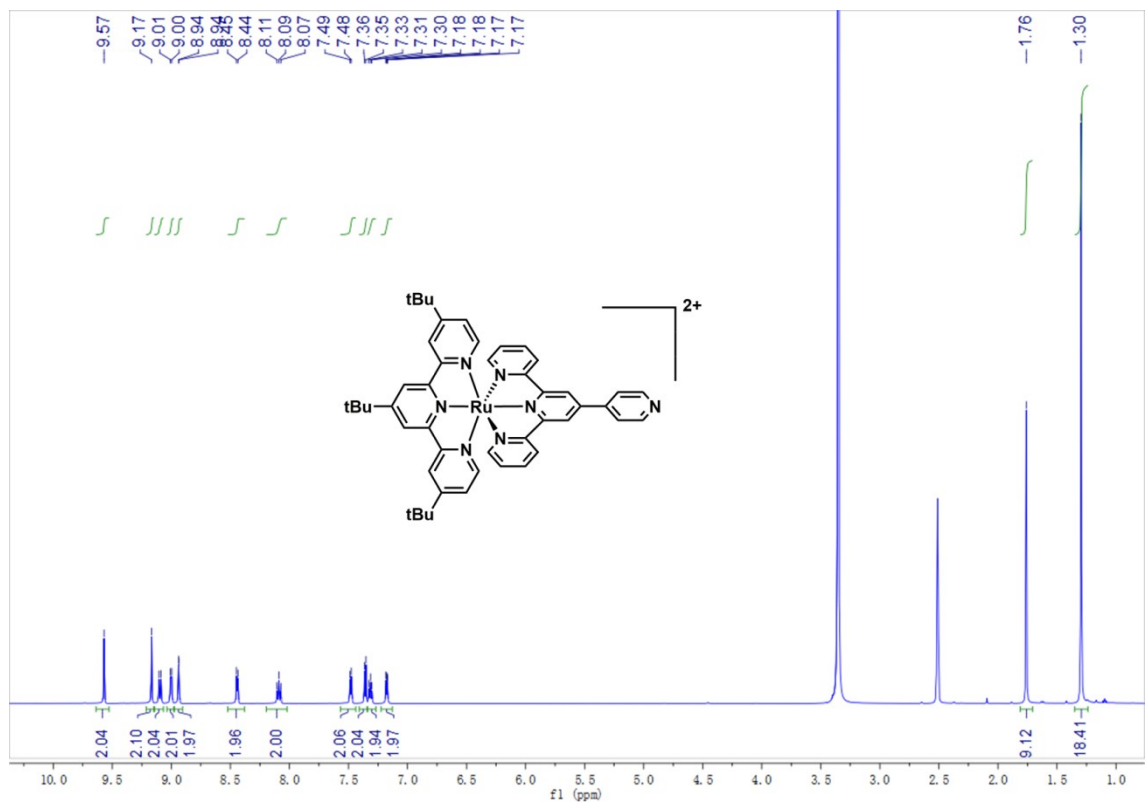

Figure S6.  $^1\text{H}$  NMR spectrum (500 MHz,  $d_6$ -DMSO) of complex 2.

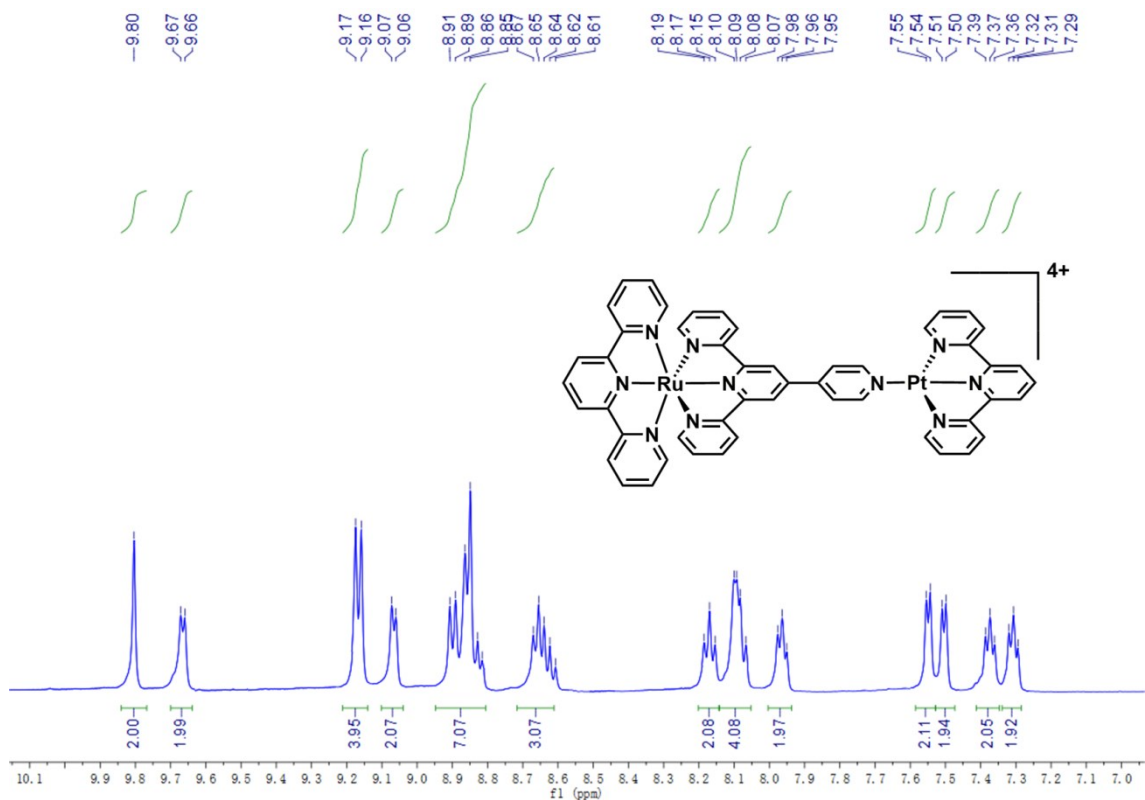

**Figure S7.**  $^1\text{H}$  NMR spectrum (500 MHz,  $d_6$ -DMSO) of complex 4.

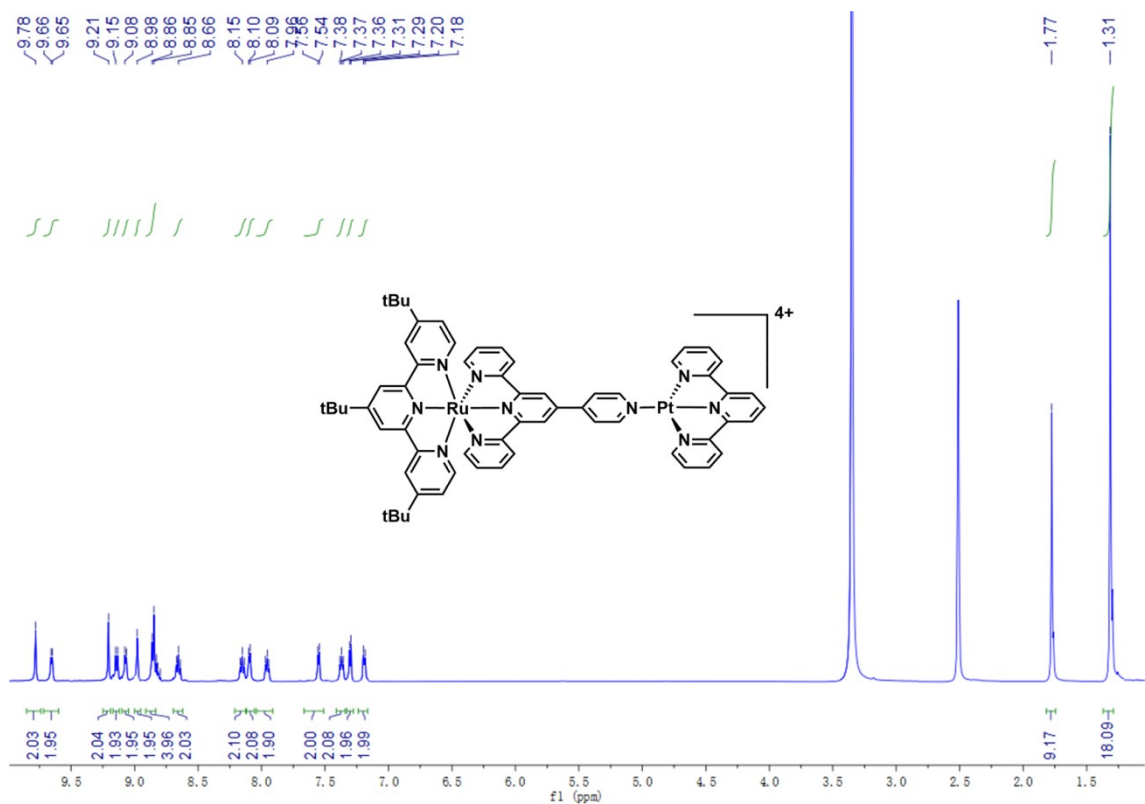

**Figure S8.**  $^1\text{H}$  NMR spectrum (500 MHz,  $d_6$ -DMSO) of complex 5.

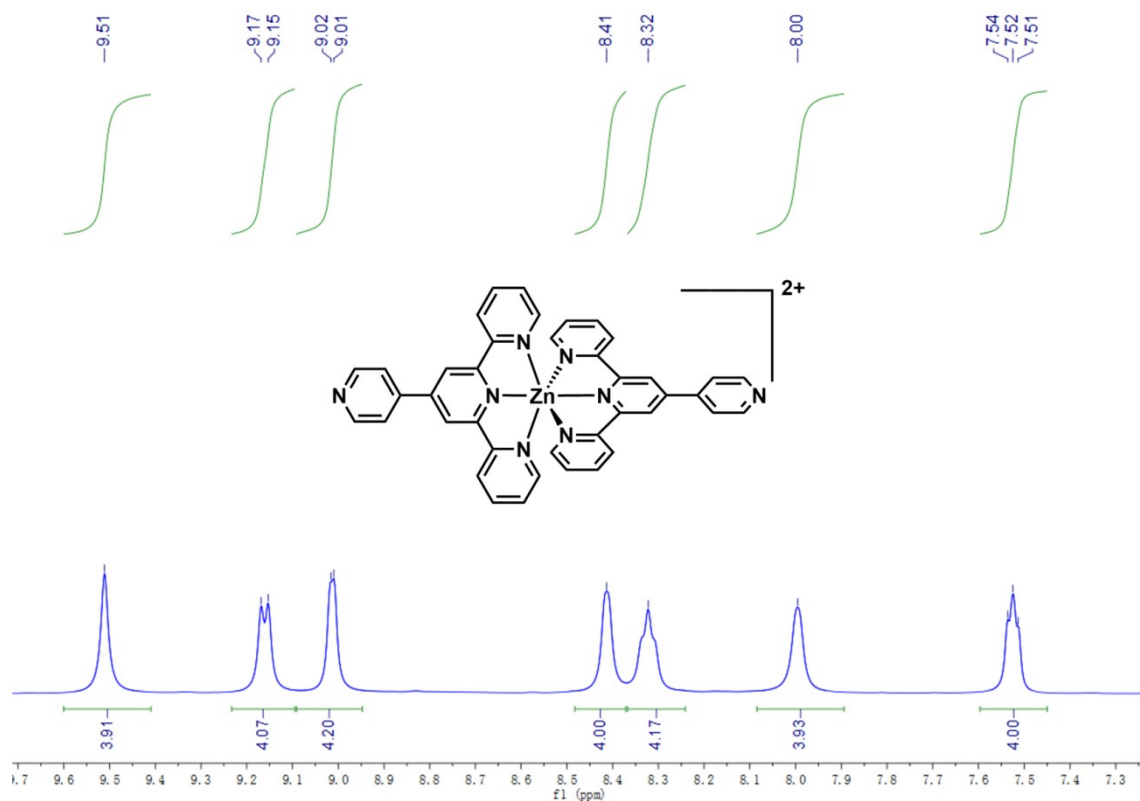

**Figure S9.** <sup>1</sup>H NMR spectrum (500 MHz, d<sub>6</sub>-DMSO) of complex 3.

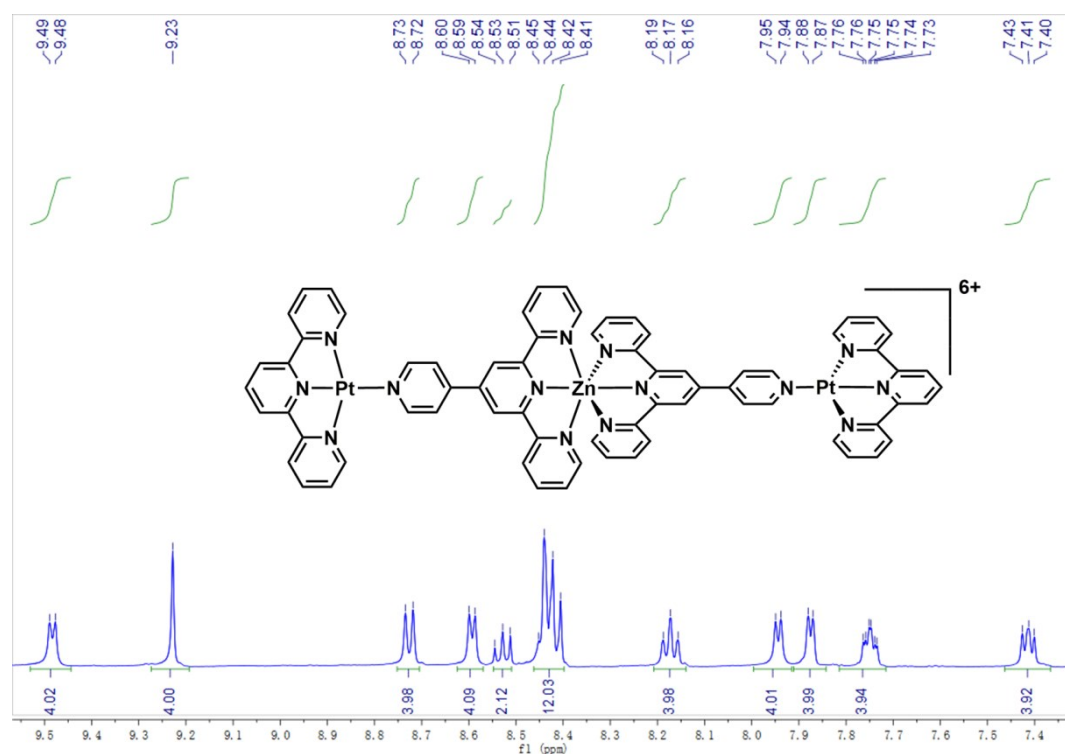

**Figure S10.** <sup>1</sup>H NMR spectrum (500 MHz, D<sub>2</sub>O) of complex 6.

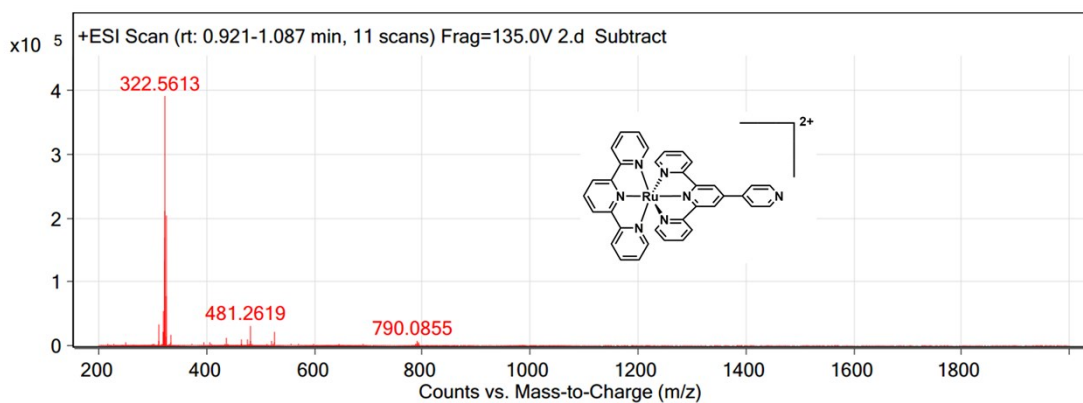

**Figure S11.** ESI-MS spectrum of complex 1.

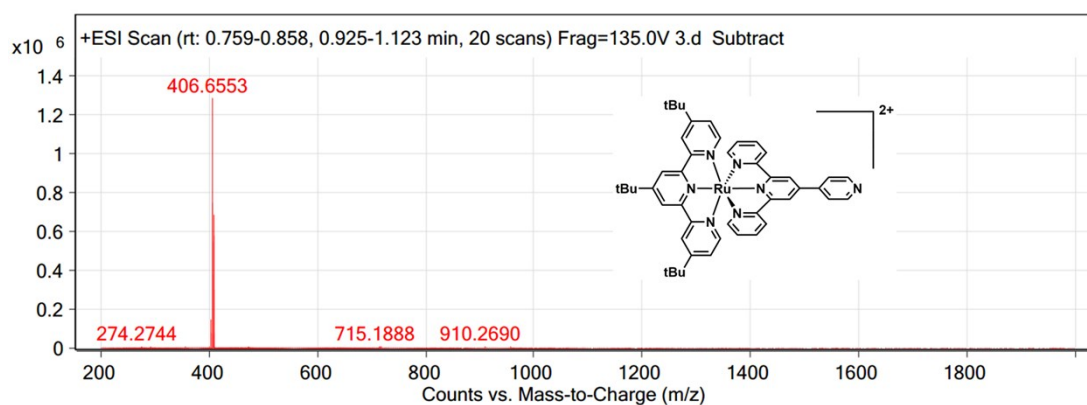

**Figure S12.** ESI-MS spectrum of complex 2.

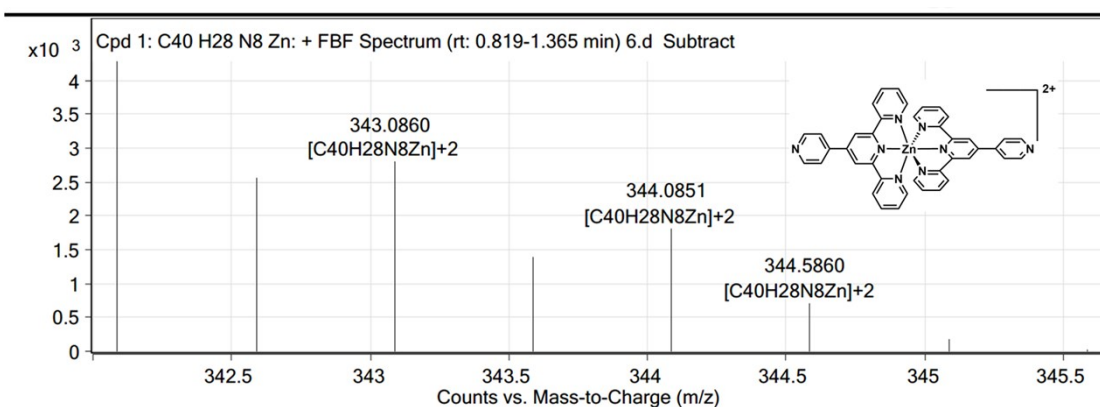

**Figure S13.** ESI-MS spectrum of complex 3.

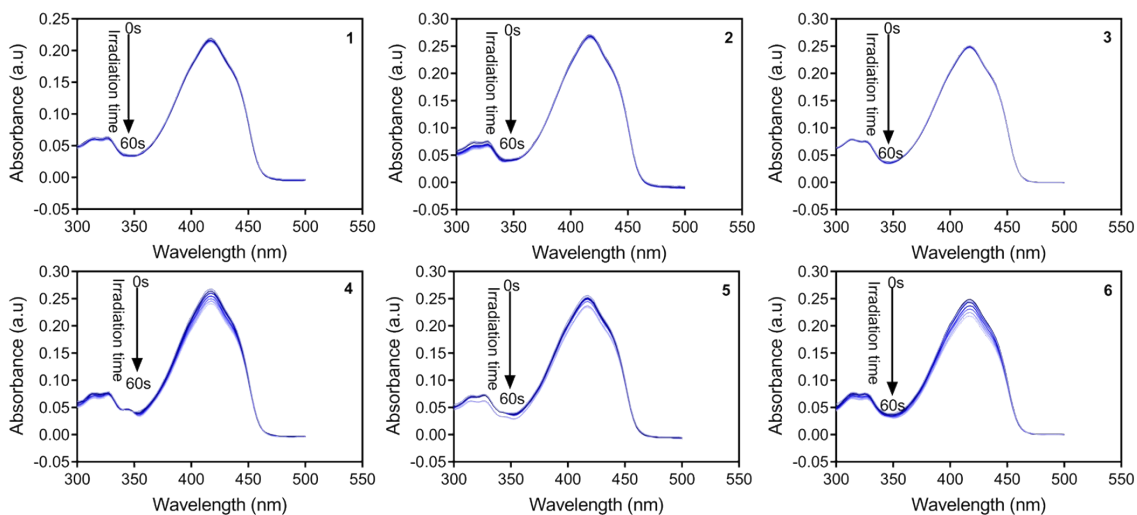

**Figure S14.** UV-vis absorption spectra of the DPBF (initial concentration = 10  $\mu$ M) sensitized by complexes **1-6** in aerated DMSO. The absorbance of DPBF at 418 nm was recorded every 10 s.

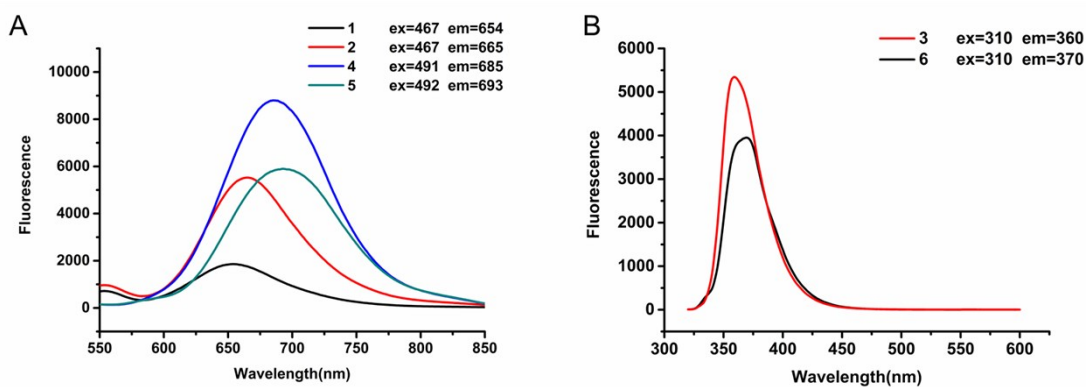

**Figure S15.** Single-photon excited fluorescence spectra for complexes **1, 2, 4, 5** in H<sub>2</sub>O solution. ( $c=1.0 \times 10^{-5}$  mol/L, A). Single-photon excited fluorescence spectra for complexes **3, 6** in H<sub>2</sub>O solution. ( $c=1.0 \times 10^{-5}$  mol/L, B)

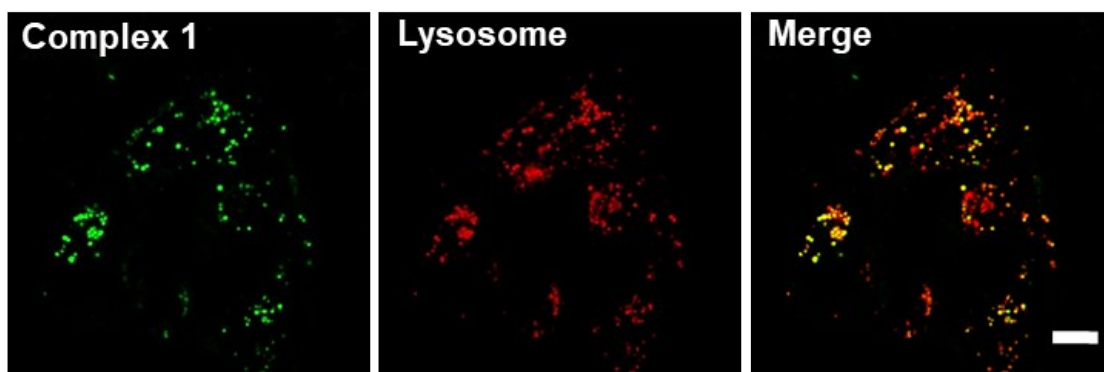

**Figure. S16.** Co-localization experiments involving complex 1 and Lyso Tracker Red (LTR) in HeLa cells. The cells were incubated with LTR (1  $\mu$ M) for 8 min and incubated with complex 1 (5  $\mu$ M) upon dark environment for 5 min. Confocal images from complex 1 (ex = 405 nm) and LTR (ex = 594 nm) were on One-Photon Channel. Scale bar = 5  $\mu$ m.

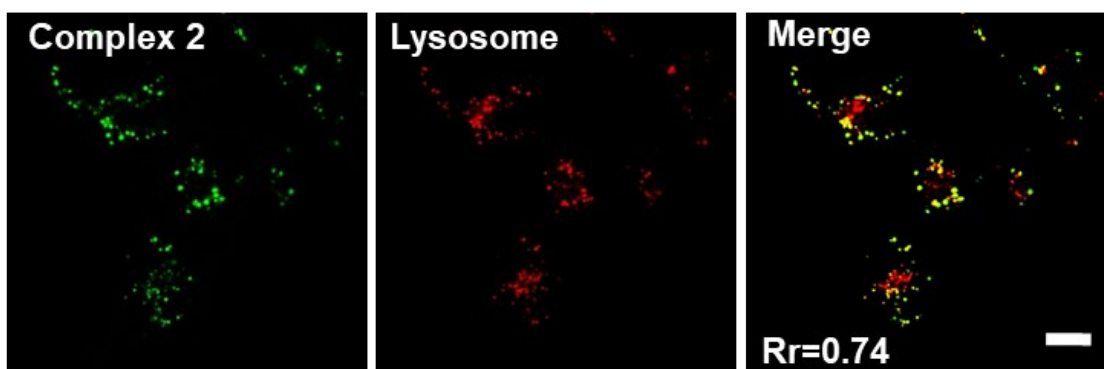

**Figure. S17.** Co-localization experiments involving complex 2 and Lyso Tracker Red (LTR) in HeLa cells. The cells were incubated with LTR (1  $\mu$ M) for 8 min and incubated with complex 2 (5  $\mu$ M) upon dark environment for 5 min. Confocal images from complex 2 (ex = 405 nm) and LTR (ex = 594 nm) were on One-Photon Channel. Scale bar = 5  $\mu$ m.



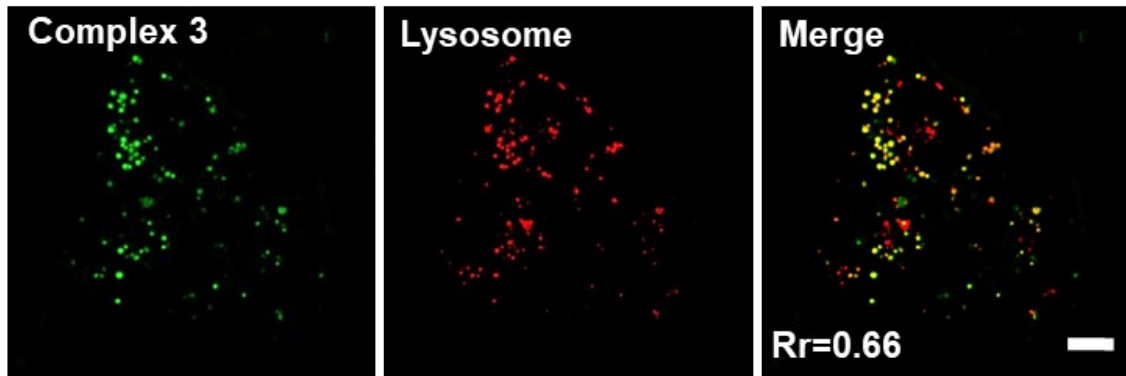

**Figure. S18.** Co-localization experiments involving complex 3 and Lyso Tracker Red (LTR) in HeLa cells. The cells were incubated with LTR (1  $\mu\text{M}$ ) for 8 min and incubated with complex 3 (5  $\mu\text{M}$ ) upon dark environment for 5 min. Confocal image from complex 3 (ex = 405 nm) and LTR (ex = 594 nm) were on One-Photon Channel. Scale bar = 5  $\mu\text{m}$ .

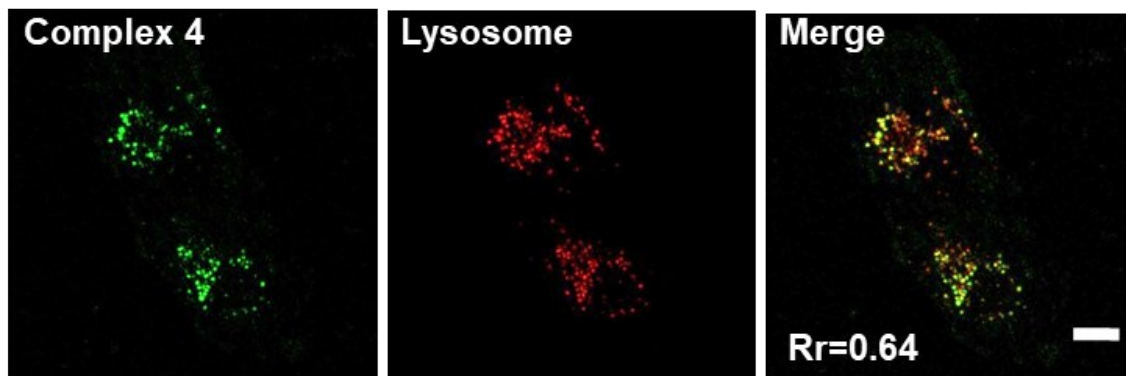

**Figure. S19.** Co-localization experiments involving complex 4 and Lyso Tracker Red (LTR) in HeLa cells. The cells were incubated with LTR (1  $\mu\text{M}$ ) for 8 min and incubated with complex 4 (5  $\mu\text{M}$ ) upon dark environment for 5 min. Confocal images from complex 4 (ex = 405 nm) and LTR (ex = 594 nm) were on One-Photon Channel. Scale bar = 5  $\mu\text{m}$ .

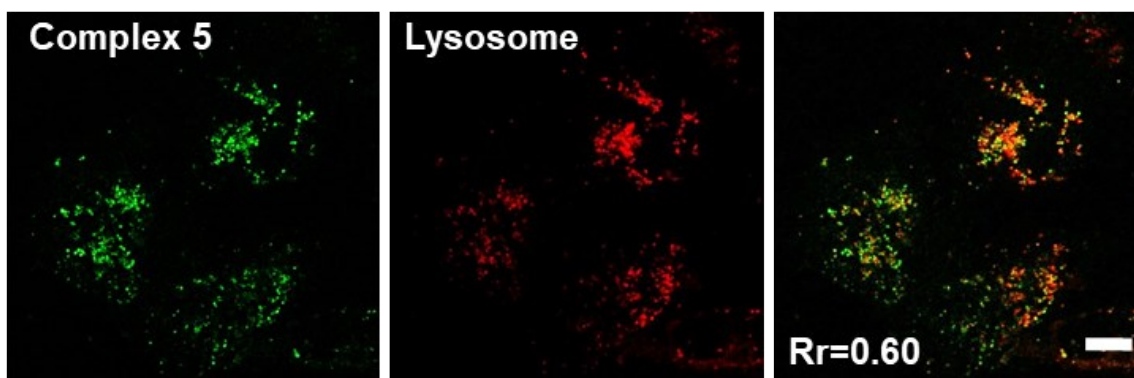

**Figure. S20.** Co-localization experiments involving complex 5 and Lyso Tracker Red (LTR) in HeLa cells. The cells were incubated with LTR (1  $\mu$ M) for 8 min and incubated with complex 5 (5  $\mu$ M) upon dark environment for 5 min. Confocal images from complex 5 (ex = 405 nm) and LTR (ex = 594 nm) were on One-Photon Channel. Scale bar = 5  $\mu$ m.

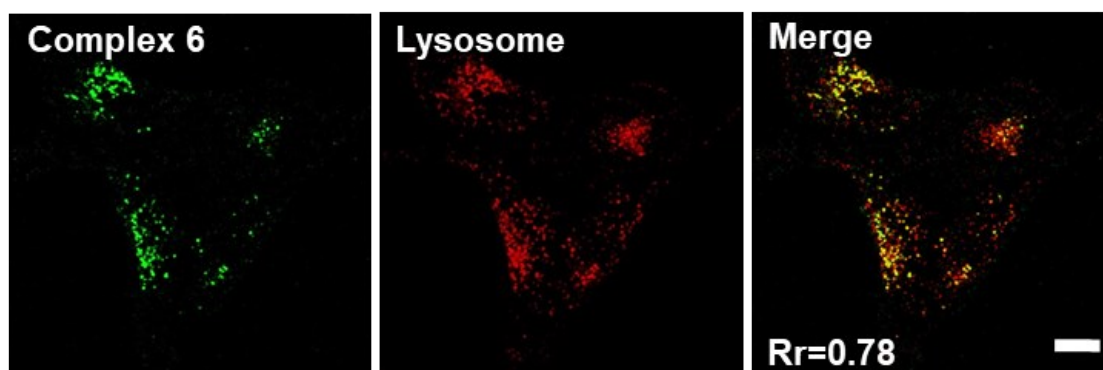

**Figure. S21.** Co-localization experiments involving complex 6 and Lyso Tracker Red (LTR) in HeLa cells. The cells were incubated with LTR (1  $\mu$ M) for 8 min and incubated with complex 6 (5  $\mu$ M) upon dark environment for 5 min. Confocal images from complex 6 (ex = 405 nm) and LTR (ex = 594 nm) were on One-Photon Channel. Scale bar = 5  $\mu$ m.

### In vitro cytotoxicity of complexes 1 to 6 in dark and under light irradiation

Considering that Ru-Pt and Zn-Pt complex exhibited a certain ability to generate  $^1\text{O}_2$  under cell-free conditions, we evaluated the vitro cytotoxicity of complexes 1-6 against HeLa cell lines via MTT assay in dark and under light irradiation (Fig. S22). All the platinumization derivatives exhibited decreased  $\text{IC}_{50}$  values when compared with the corresponding  $\text{Ru}^{\text{II}}$  or  $\text{Zn}^{\text{II}}$  precursors in the absence of light (Table S7), indicating that  $\text{Pt}^{\text{II}}(\text{tpy})$  fragments evidently improve the cytotoxicity of the Ru-Pt or Zn-Pt complexes. However, when irradiated with 365 nm ultraviolet light for 30 min, the  $\text{IC}_{50}$  values for 4 and 5 increased unexpectedly while complex 6 displayed prominent photocytotoxicity. We suggested that the increased  $\text{IC}_{50}$  values for 4 and 5 may be attributed to the cellular stress response (CSR) generated under the irradiation by ultraviolet light<sup>1,2</sup>. It can be observed from the data that metal centres have great impact on the cytotoxic activity of the heterometallic complexes, as can be seen from the different  $\text{IC}_{50}$  values of Zn-Pt and Ru-Pt complexes.

Table S7 Dark- and Photo-Toxicity<sup>a</sup> of complexes 1 to 6 toward HeLa Cells.

| HeLa cells |        |       |                 |
|------------|--------|-------|-----------------|
| complex    | dark   | light | PI <sup>b</sup> |
| 1          | 42.80  | 37.6  | 1.14            |
| 2          | 40.20  | 29.93 | 1.34            |
| 4          | 25.01  | 59.40 | <1              |
| 5          | 27.30  | 42.09 | <1              |
| 3          | 150.90 |       |                 |
| 6          | 139.2  | 31.43 | 4.43            |

<sup>a</sup> $\text{IC}_{50}$  values were an average of three measurements ( $\mu\text{mol/L}$ ).

<sup>b</sup>PI, which is the ratio of dark  $\text{IC}_{50}$  and light  $\text{IC}_{50}$  values

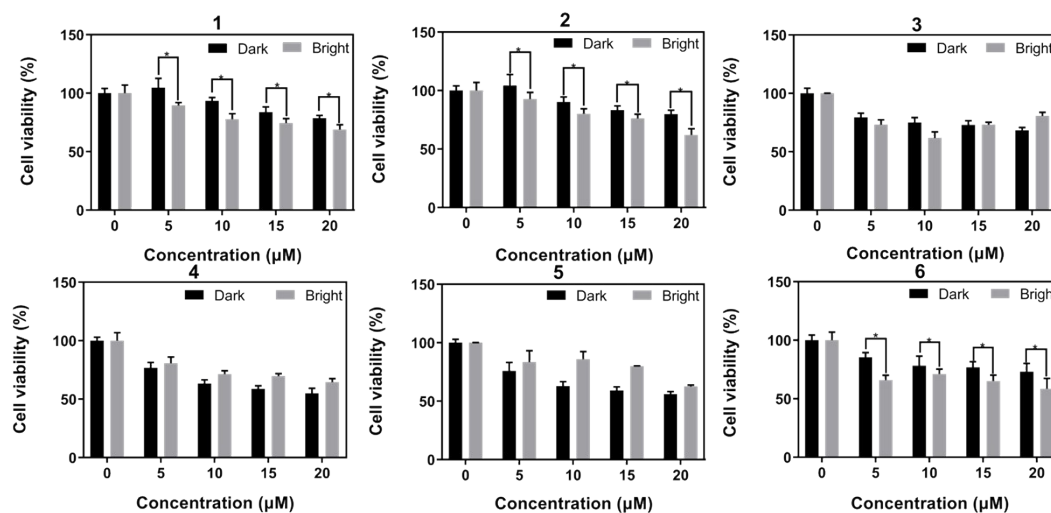

Fig. S22 Cell viability of HeLa cells incubated with complex 1 to 6.

### References:

1. W. J. Welch, *Physiol. Rev.*, 1992, **72**, 1063-1081.
2. D. Kültz, *Annu. Rev. Physiol.*, 2005, **67**, 225-257.
